# Supplementary material for: Removal of Colored Organic Pollutants from Wastewaters by Magnetite/Carbon Nanocomposites: Single and Binary Systems
Source: Hindawi journal article supplement (doi:10.1155/2018/6249821), 2018-01-01

**Supplementary Figures**

**SuppFig. 1**.Calibration curve for ChS, NB and BR2 dyes


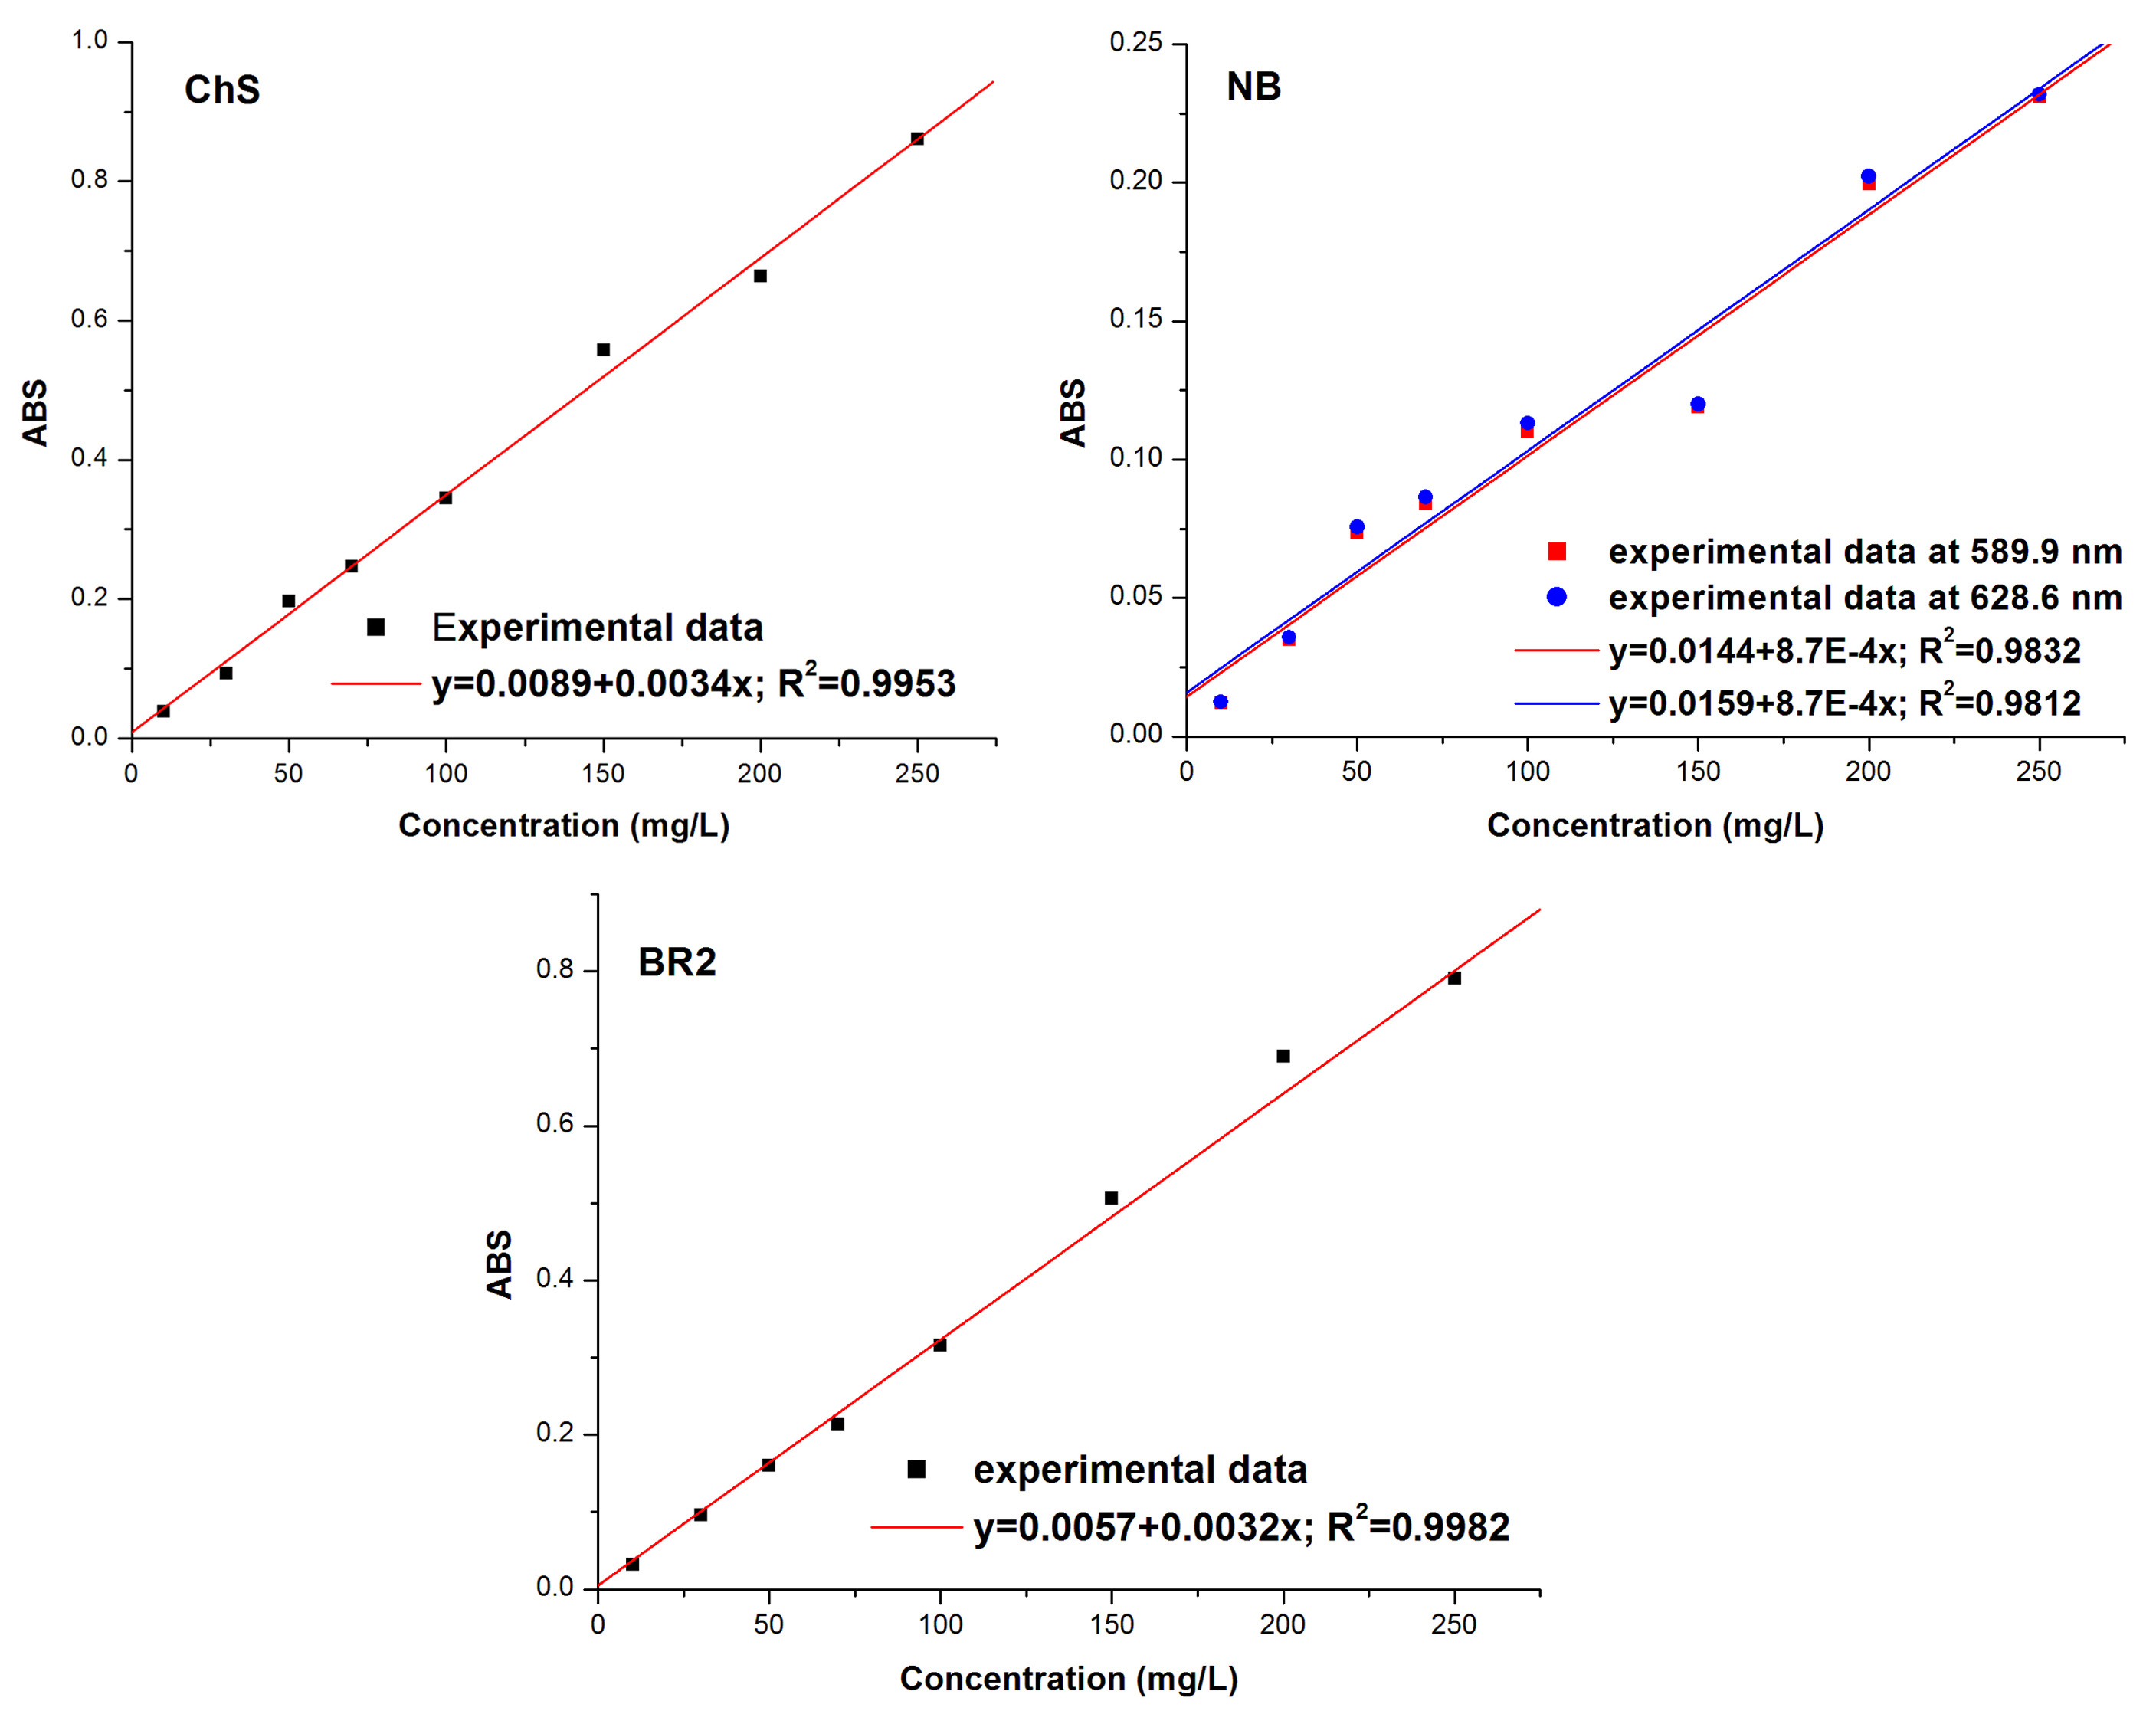


**SuppFig. 2**.Adsorption-desorption isotherms of samples PM1, PM3, PM4, PM5 and P6 [10].

**
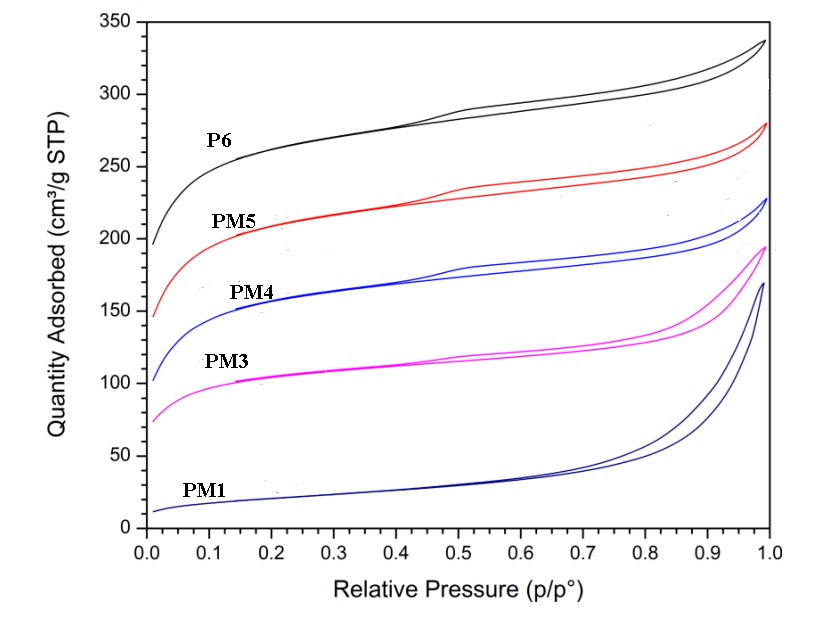
**

**SuppFig. 3**.Samples of dyes solution before and after adsorption

**
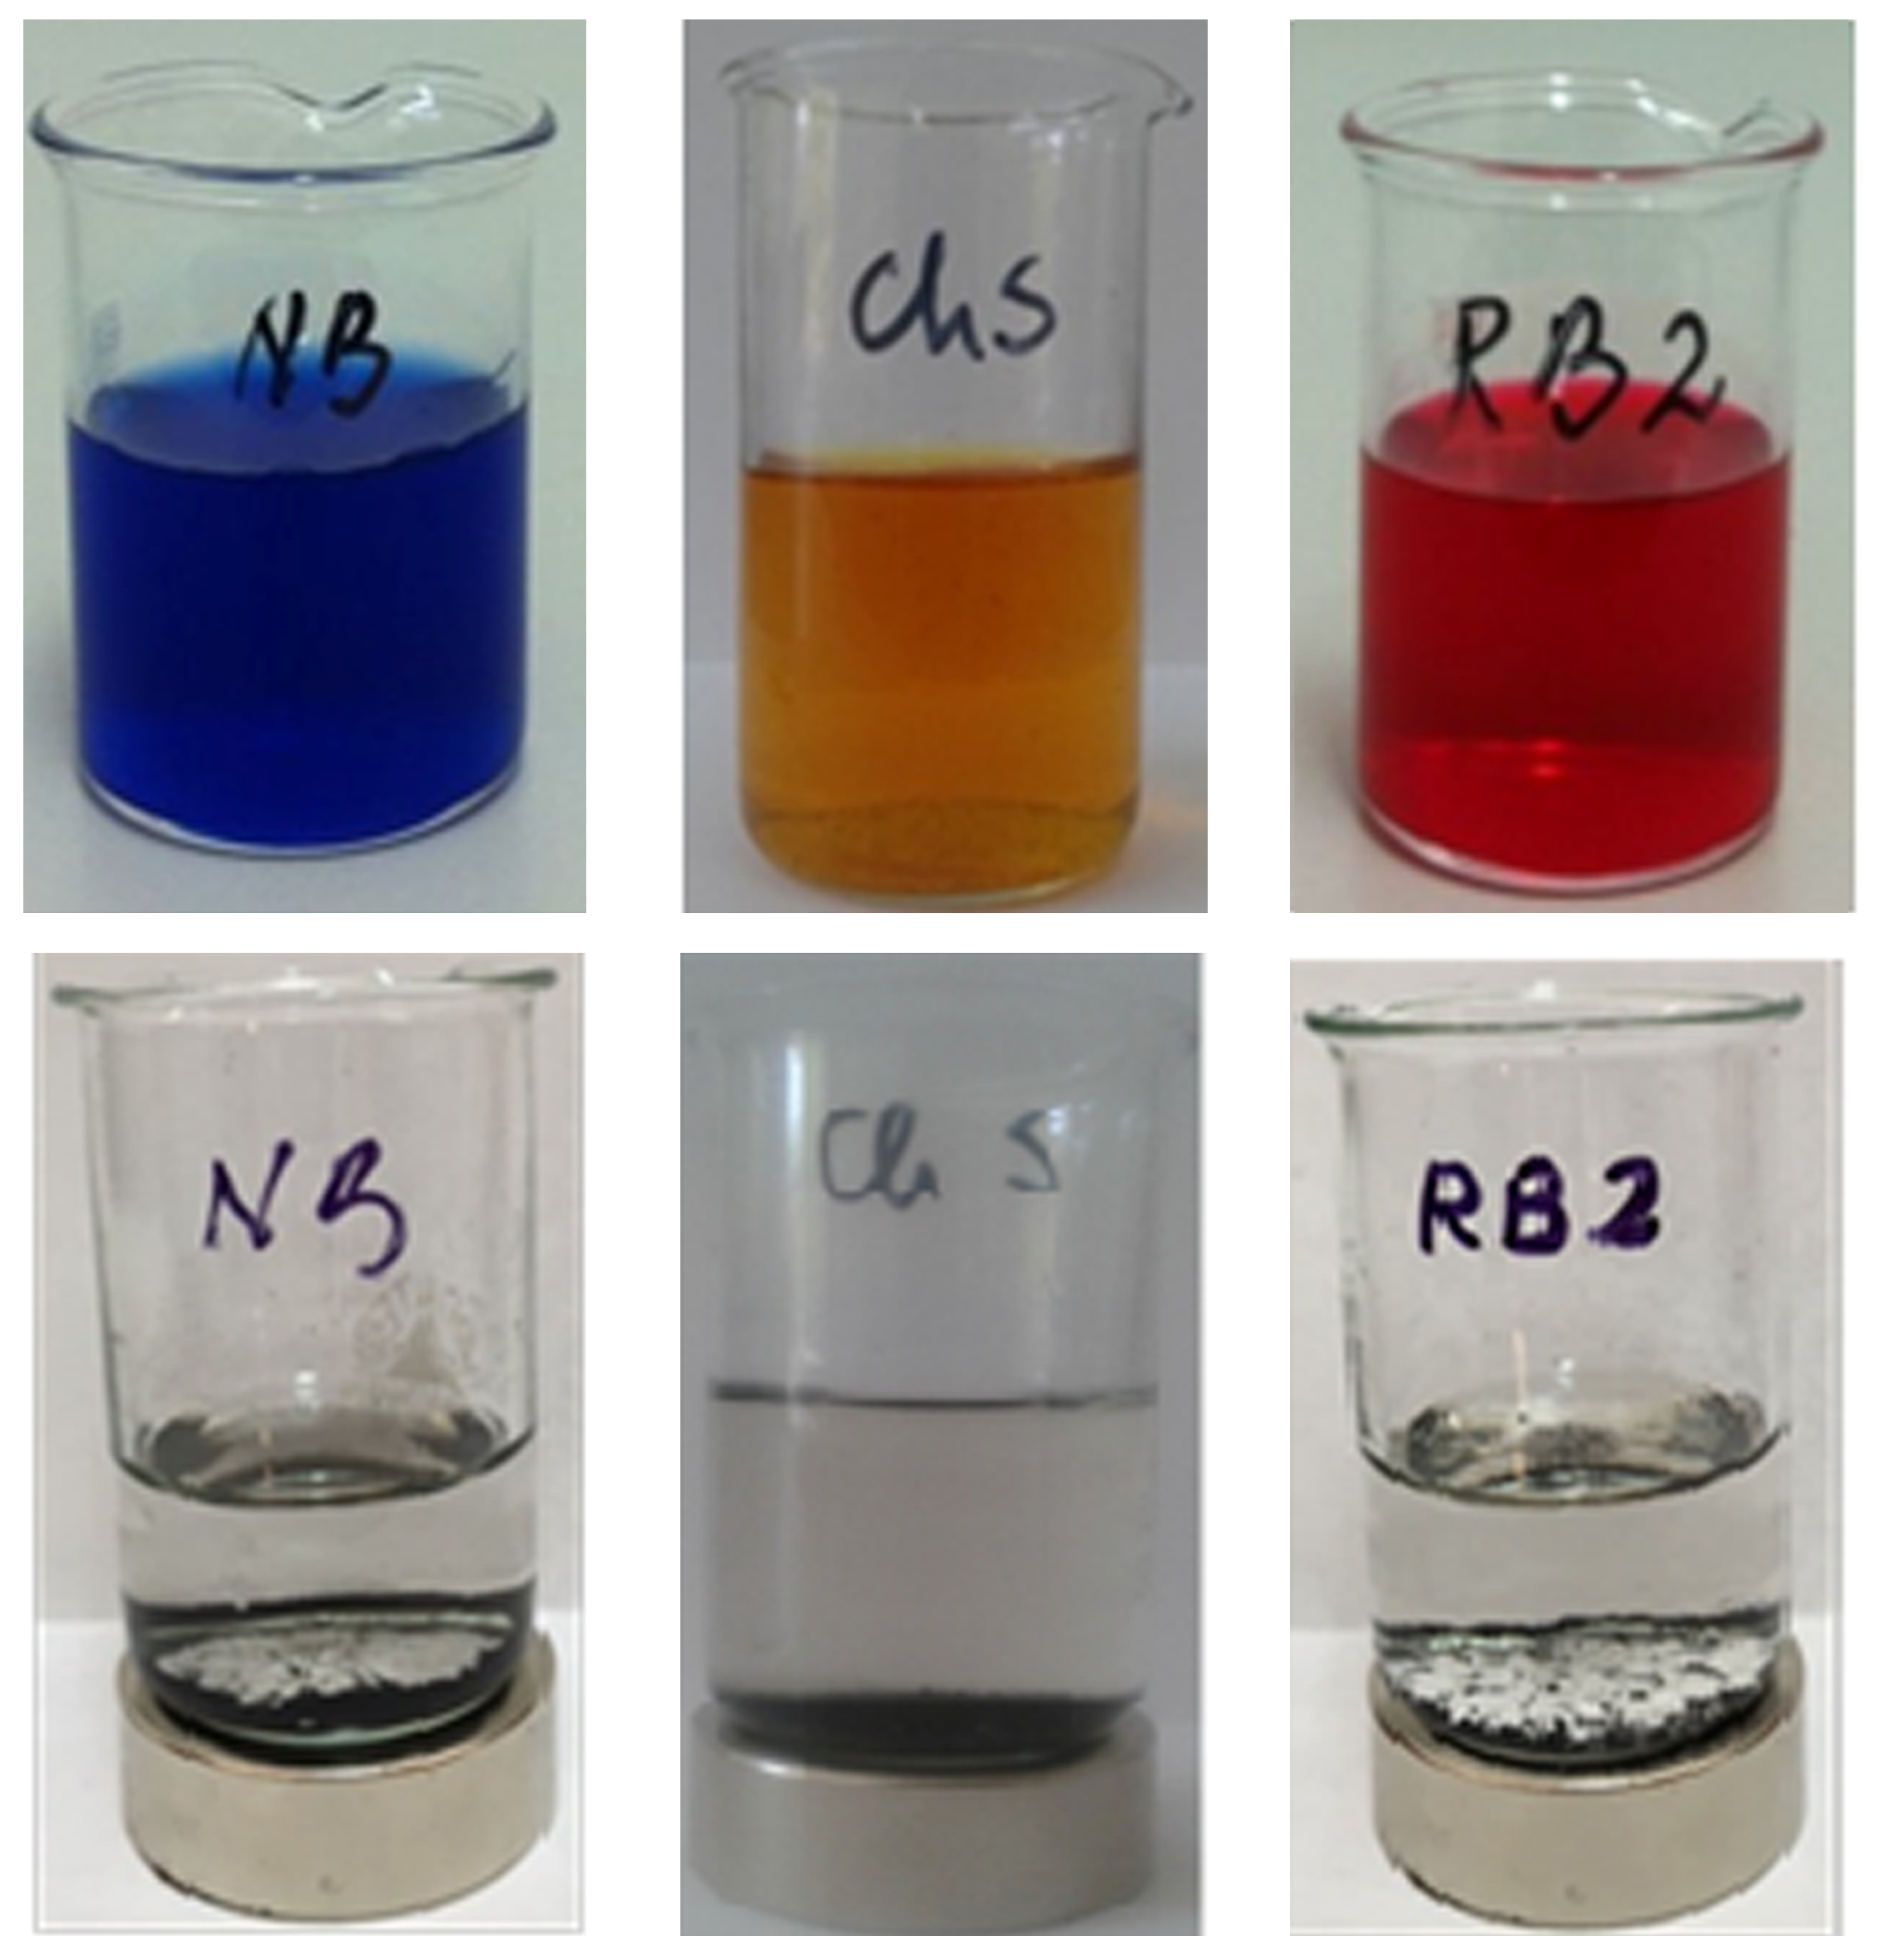
**

**SuppFig. 4**. Individual dye spectra and spectra of binary mixtures of dyes


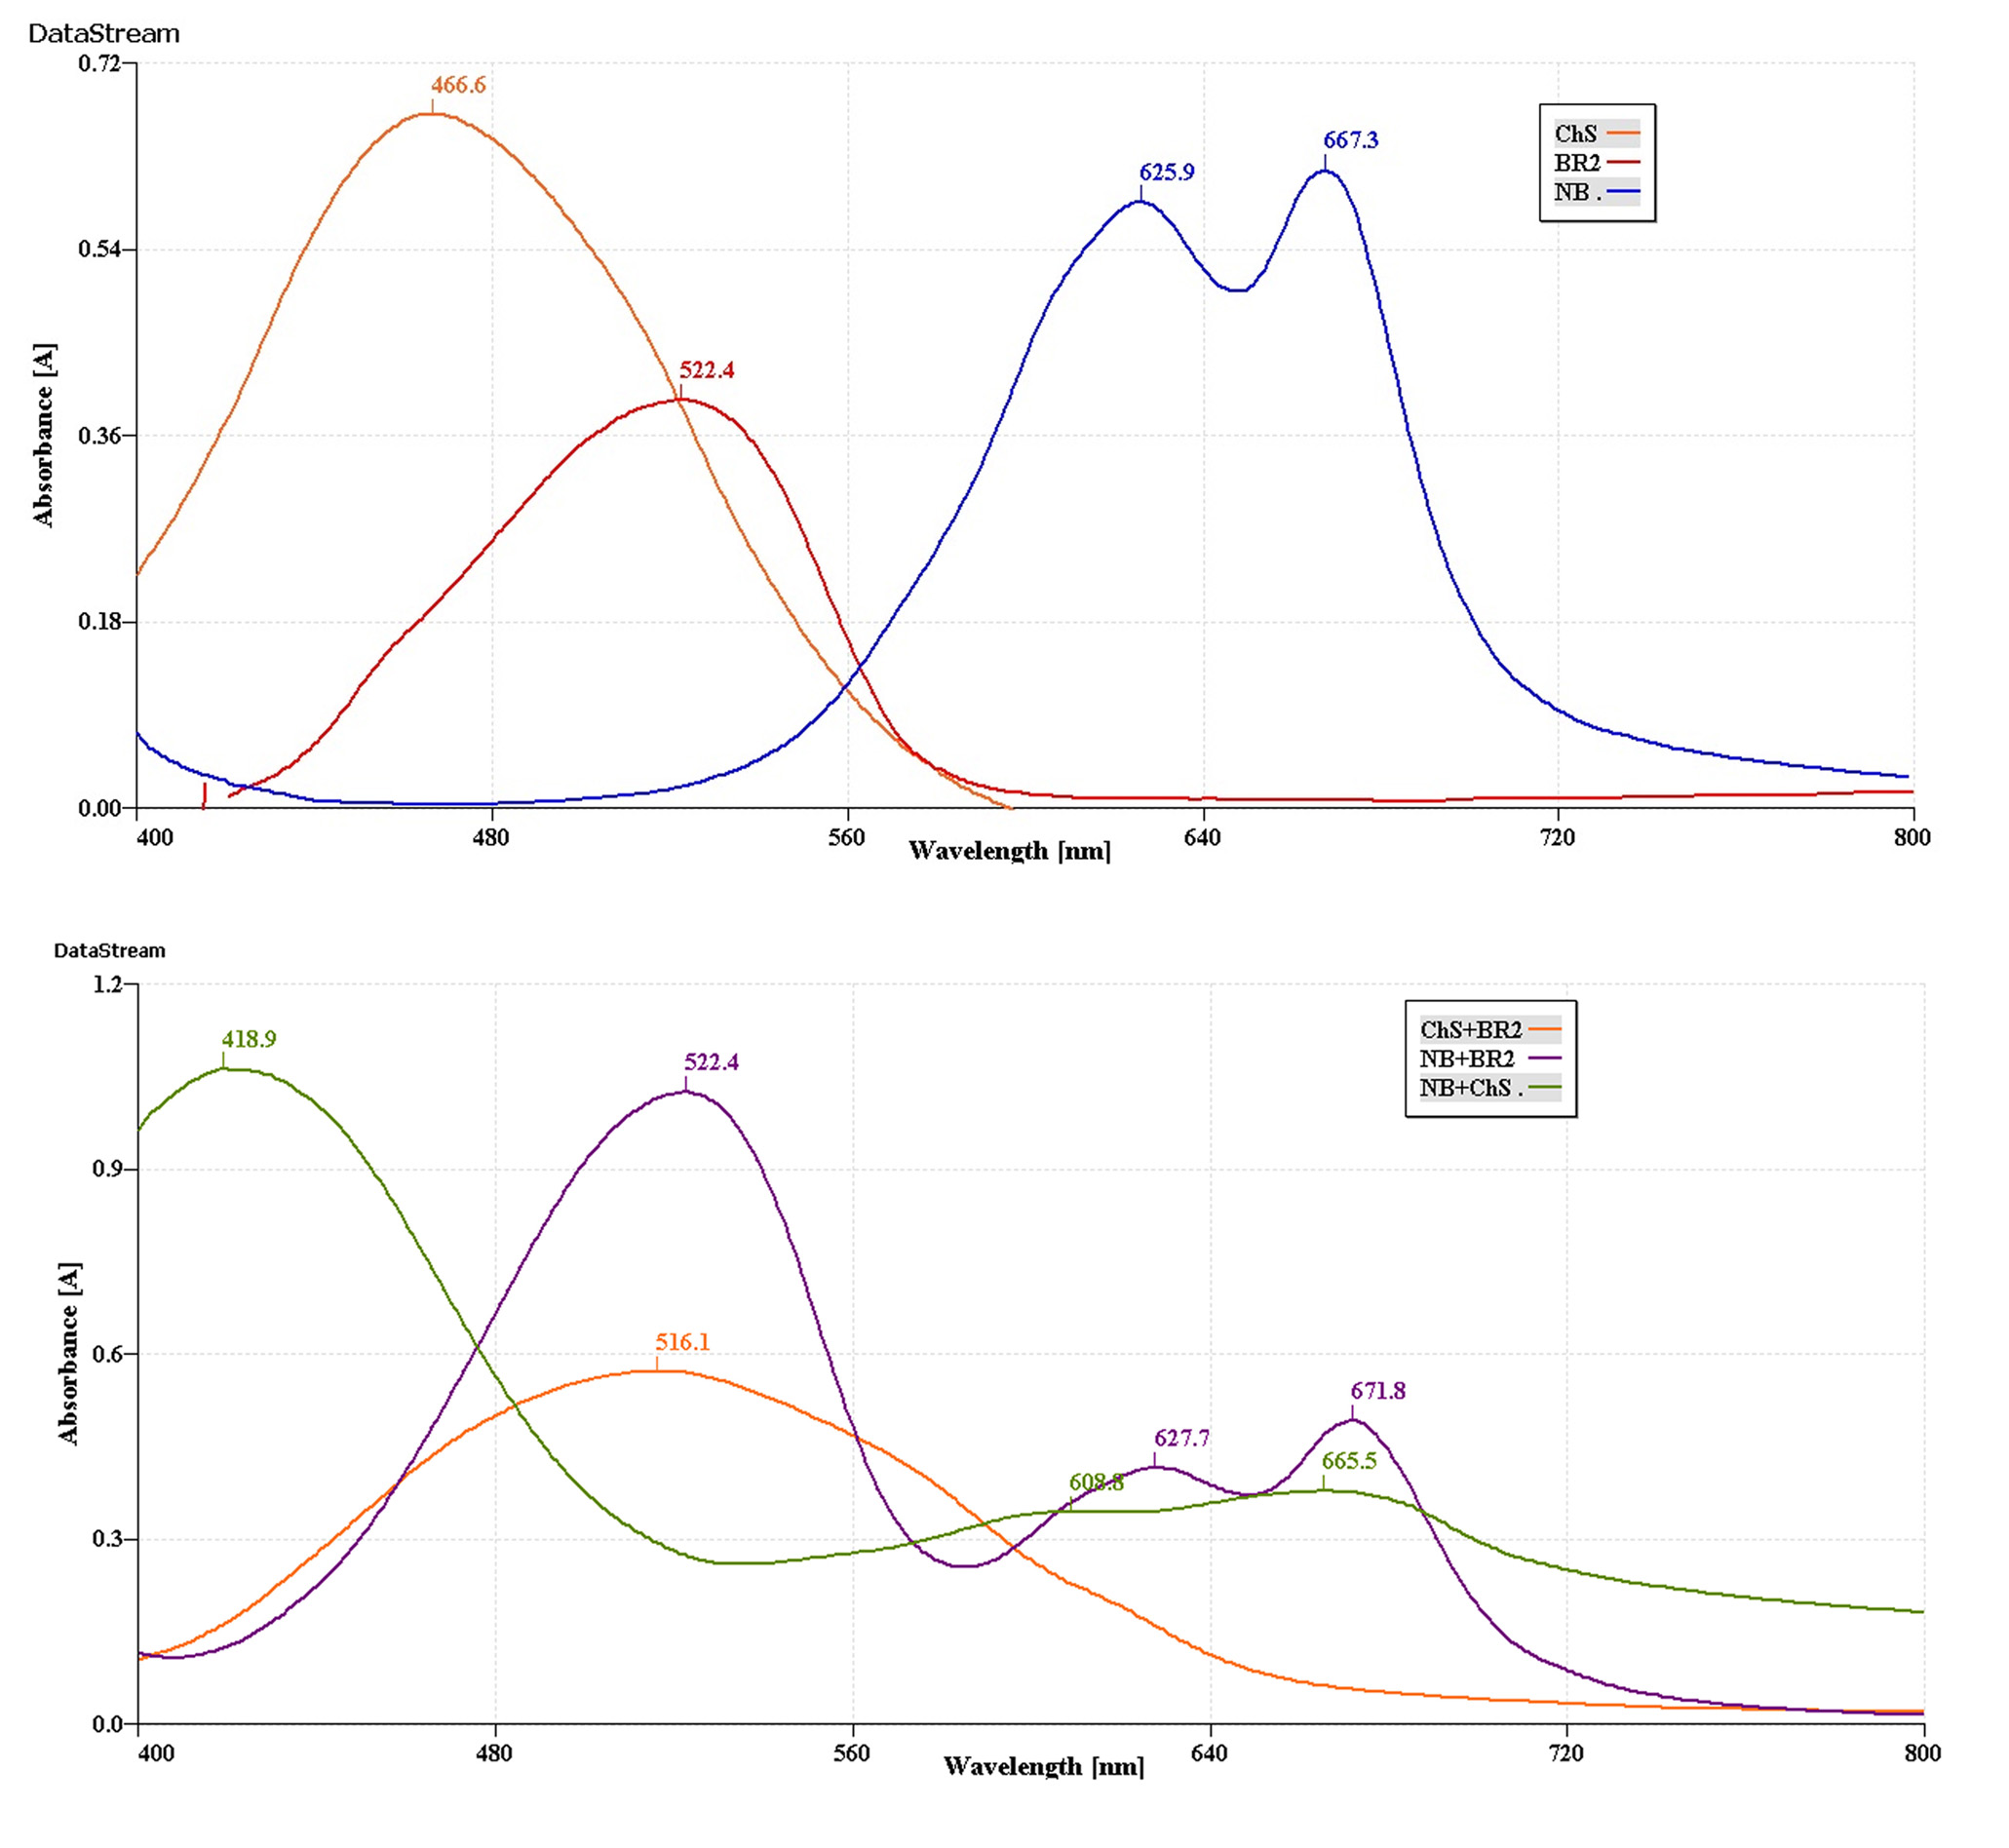

Supplement: f1 [file 6249821.f1.doc]
